# Supplementary material for: Population genetic considerations regarding the interpretation of within-patient SARS-CoV-2 polymorphism data
Source: PubMed Central journal article supplement (PMC11021480; doi:10.1038/s41467-024-46261-4), 2024-04-16
Supplement: 41467_2024_46261_MOESM1_ESM.pdf [file 41467_2024_46261_MOESM1_ESM.pdf]

10% of new mutations  
are beneficial

1% of new mutations  
are beneficial

Flynn et al.  
experimental  
DFE estimates

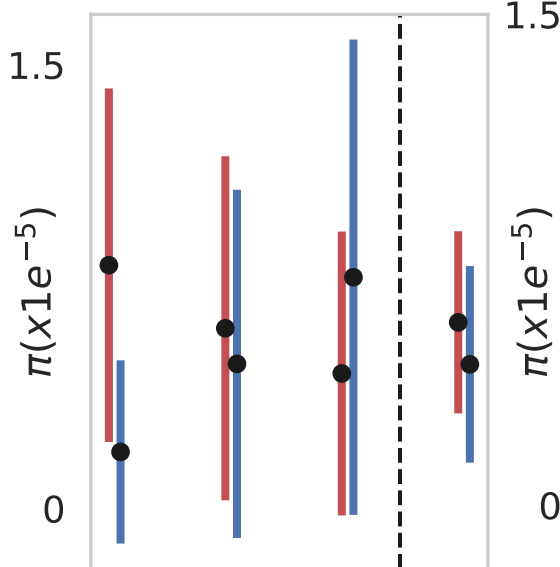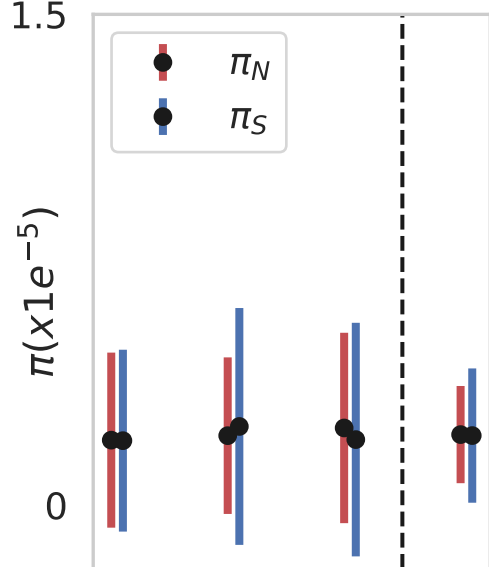

Weakly  
deleterious  
background

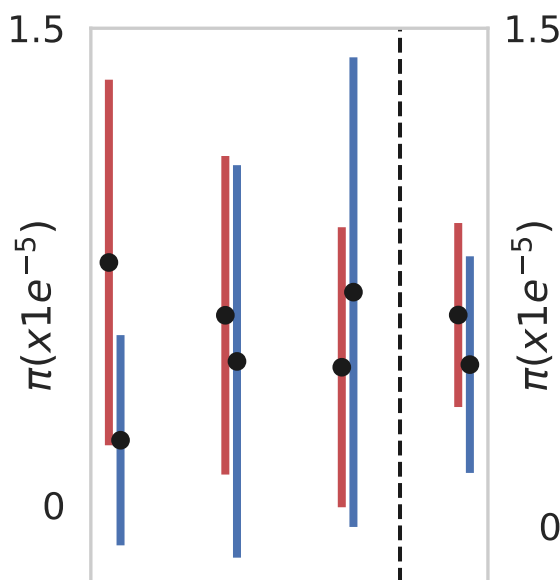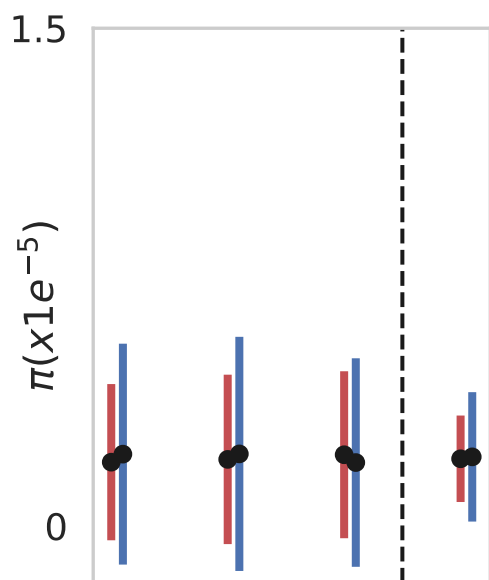

Strongly  
deleterious  
background

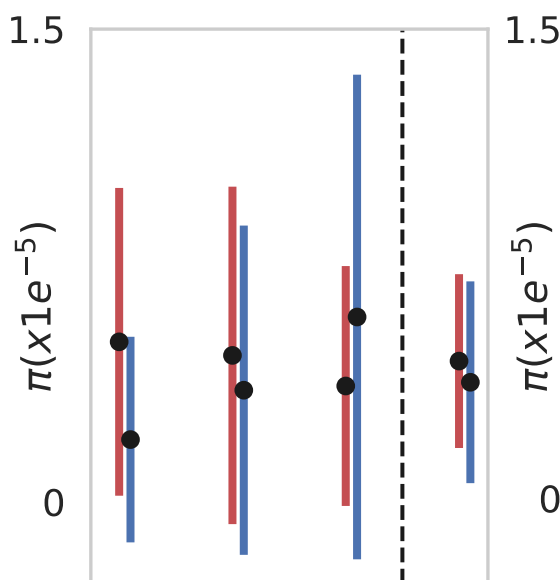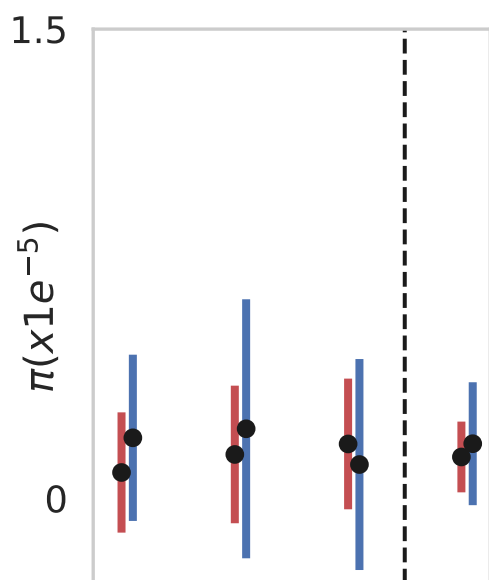

window 1  
window 2  
window 3  
whole genome

window 1  
window 2  
window 3  
whole genome

Supplementary Figure 1: Per-site  $\pi_N$  and  $\pi_S$  values simulated under recurrent beneficial mutation models, with 10% (left column) and 1% (right column) of mutations experiencing positive selection. These beneficial mutations are occurring on: the CoV-2 DFE experimentally inferred by Flynn *et al.* (2022) (top row), a weakly deleterious DFE as in the above Figures (middle row), and a strongly deleterious DFE as in the above Figures (bottom row). Plots present  $\pi_N$  (red) and  $\pi_S$  (blue) values for 10kb non-overlapping windows, as well as genome-wide (30kb) values. All other parameter details are as in Figure 1, except mutation rate/site/replication= $2.135e-7$  and carrying capacity= $1e3$ , in order to achieve  $\sim 5$  SNPs per sampled genome at  $>2.5\%$  frequency (as in the empirical data) under these recurrent positive selection models (*i.e.*, the large input of beneficial mutations necessitates a reduced mutation rate relative to the above figures, in order to maintain levels of variation consistent with the published patient data). Source data are provided as a Source Data file. All code for replicating these results is available on GitHub ([https://github.com/vivaksoni/Gu\\_etal\\_2023\\_response](https://github.com/vivaksoni/Gu_etal_2023_response)).
